# Supplementary material for: Effects of carbon diversion to primary sludge production on thermal hydrolysis pretreatment-enhanced anaerobic digestion
Source: Royal Society of Chemistry journal article supplement (doi:10.1039/d3ew00695f), 2024-01-01
Supplement: d3ew00695f1.pdf [file d3ew00695f1.pdf]

### Supplementary Materials

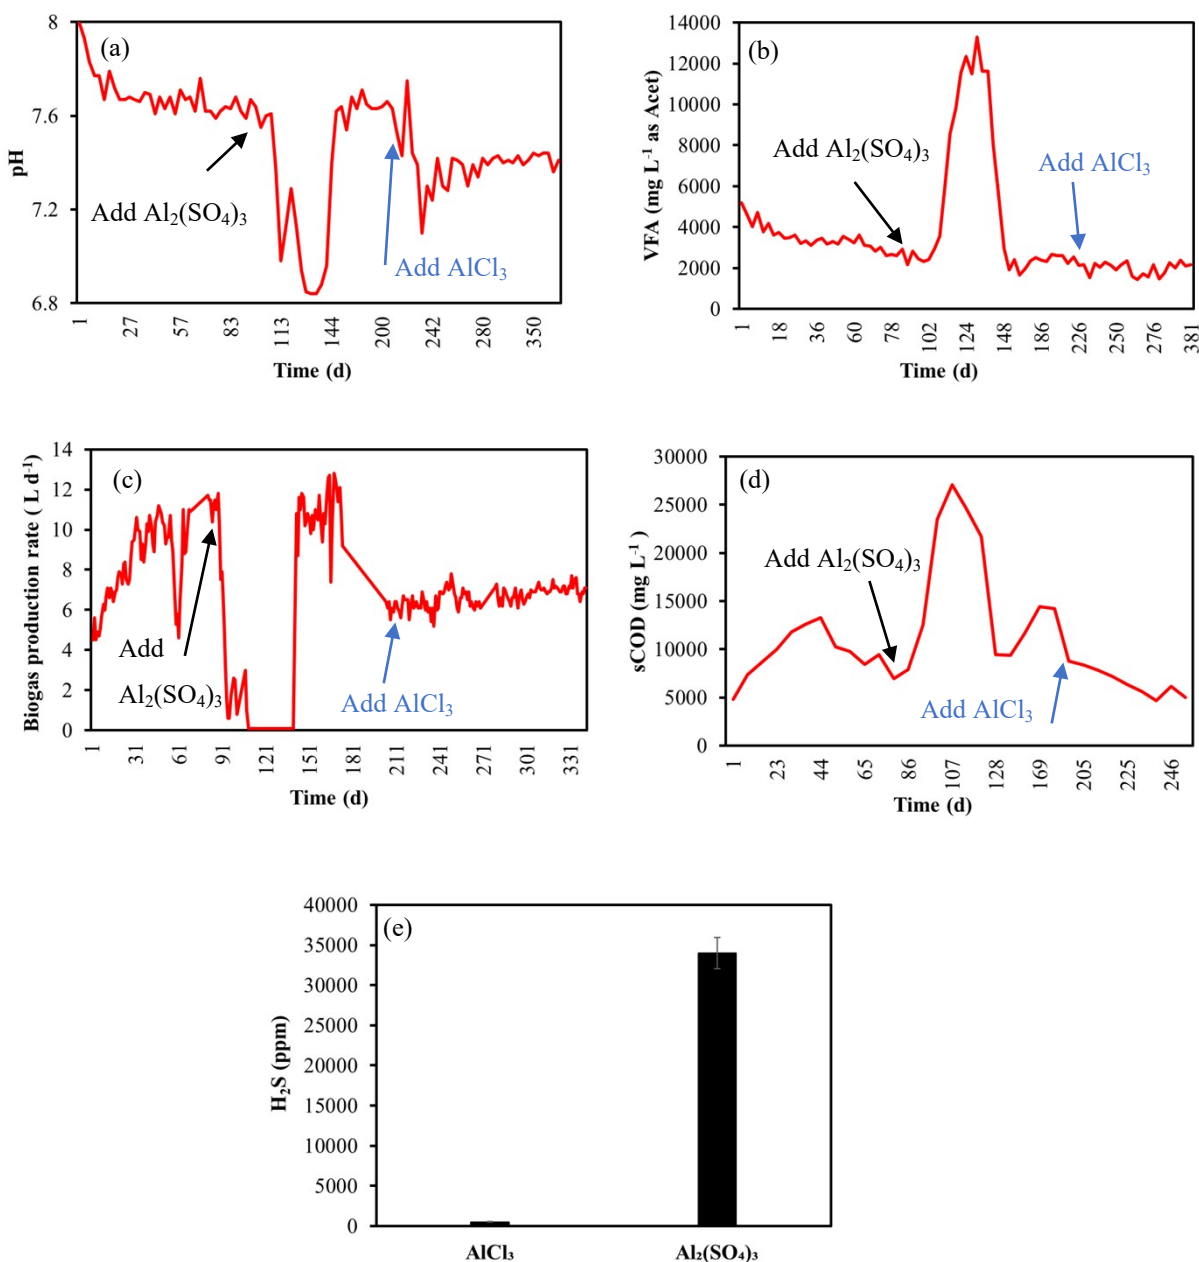

Figure S1. (a) pH, (b) VFA, (c) biogas production rate, and (d) sCOD profiles for the 1:1 PS-to-WAS dry mass blending ratio sludge spiked with high  $\text{Al}^{3+}$  dose using two different  $\text{Al}^{3+}$ -based coagulants; (e)  $\text{H}_2\text{S}$  concentration detected in biogas on day 100 and 290 with different  $\text{Al}^{3+}$ -based coagulants.
